# Supplementary material
Source: MDPI journal article supplement (https://www.mdpi.com/2571-6255/1/3/40)
Supplement: s1 [file s1]

## Supplementary information

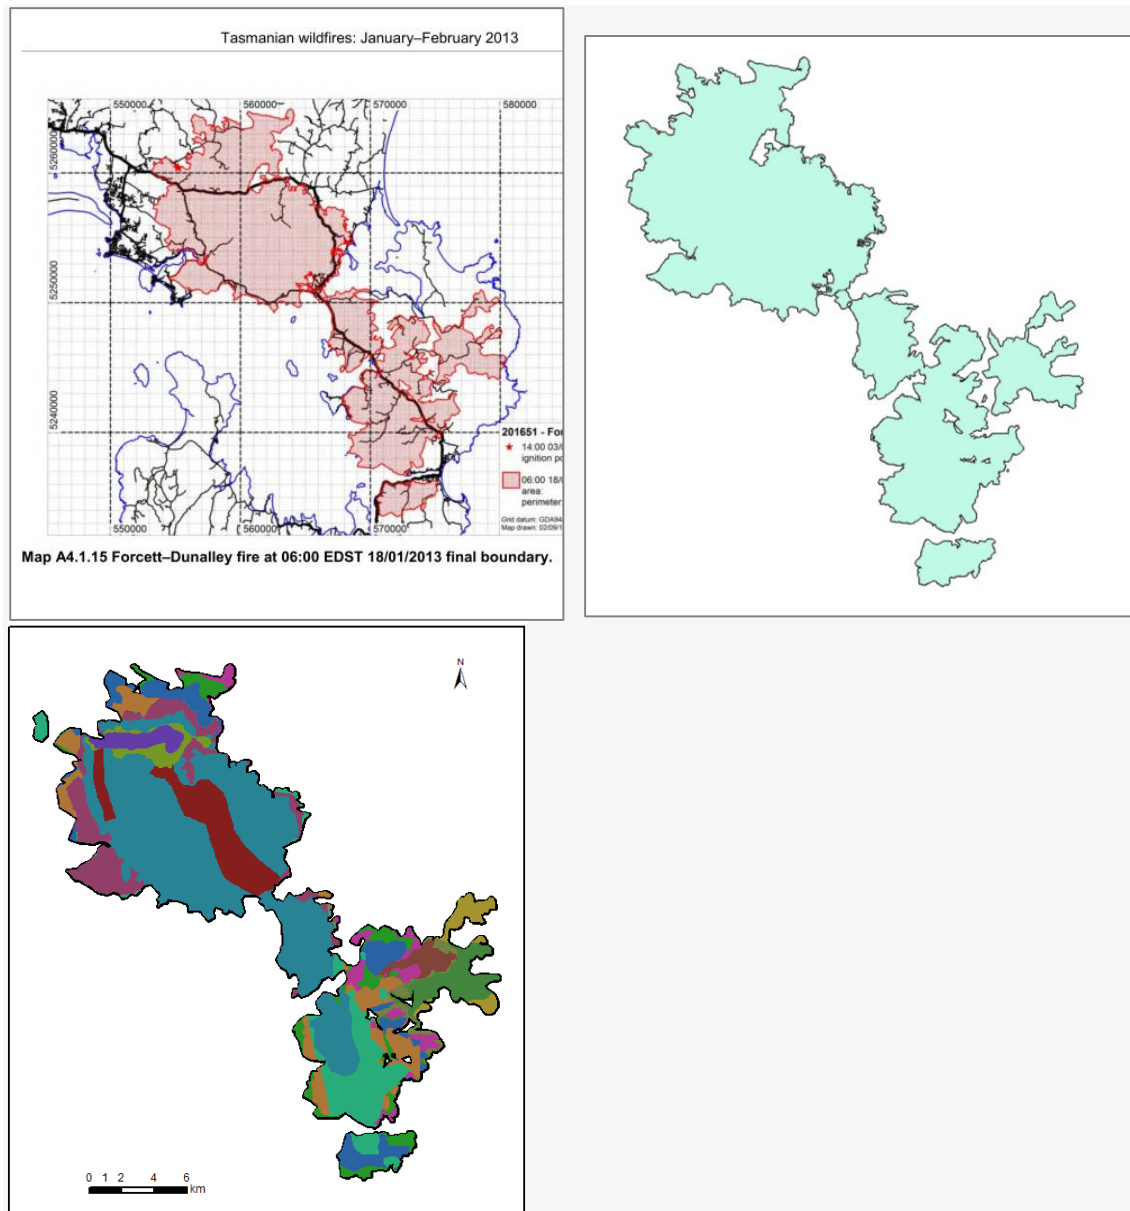

**Figure S1.** Fire perimeter maps of Forcett-Dunalley fire: (1) used in the Marsden report, (2) the same shapefile for Marsden report which we re-calculated and found more area burnt than reported, and (3) the map used in this study, which includes additional area in the north-west, and whose area is also slightly increased by 50 x 50 m grid cells at the edges of the fire perimeter.

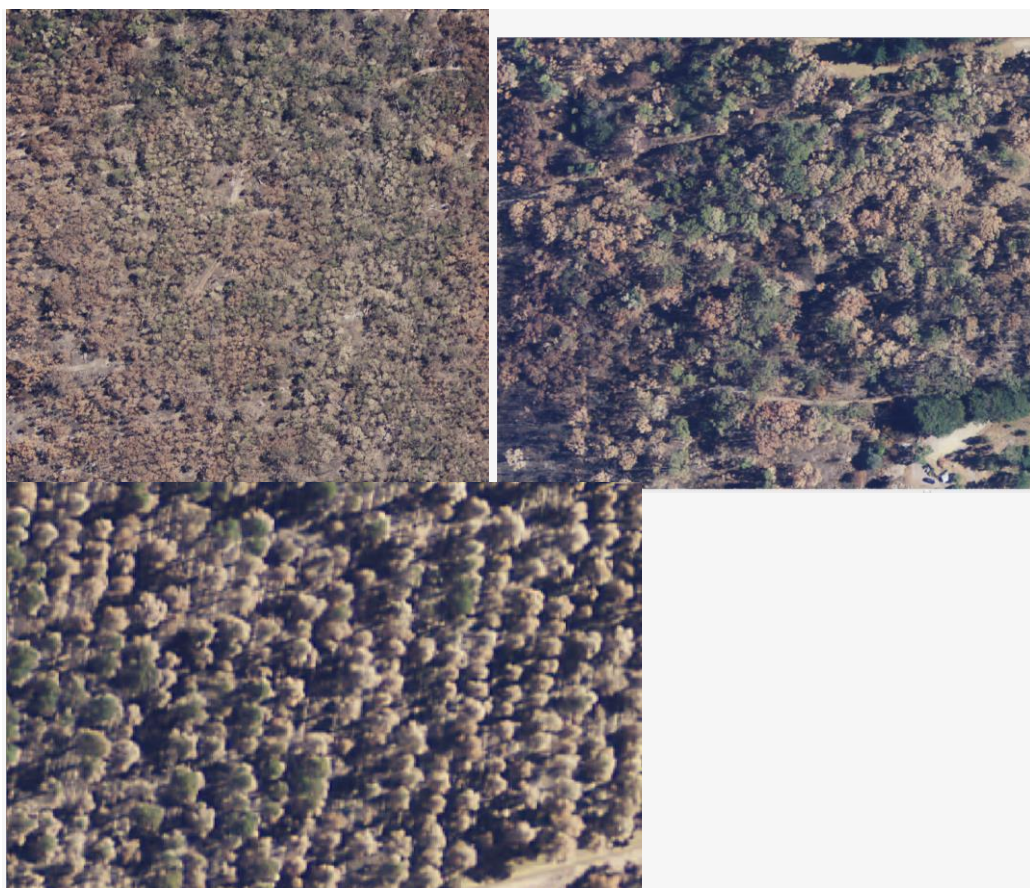

**Figure S2.** Intermittent crown scorch class on the aerial photography.

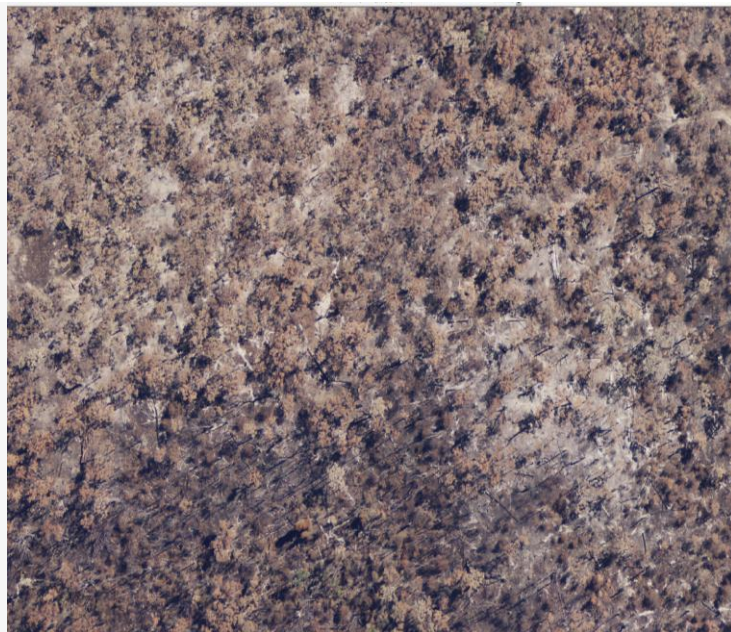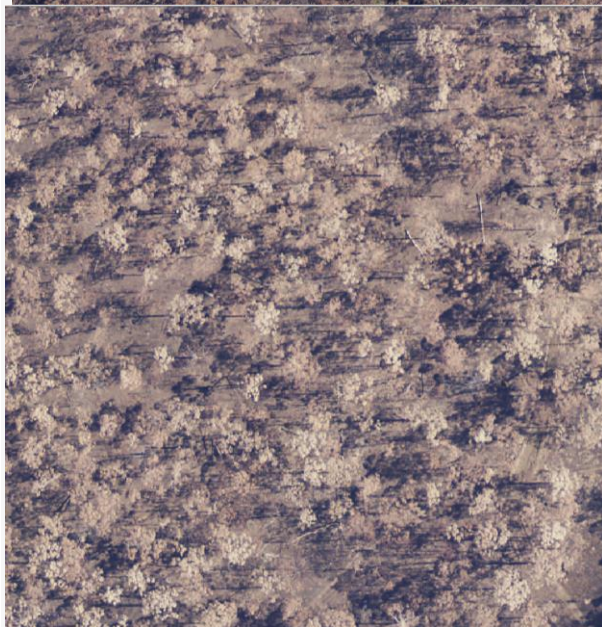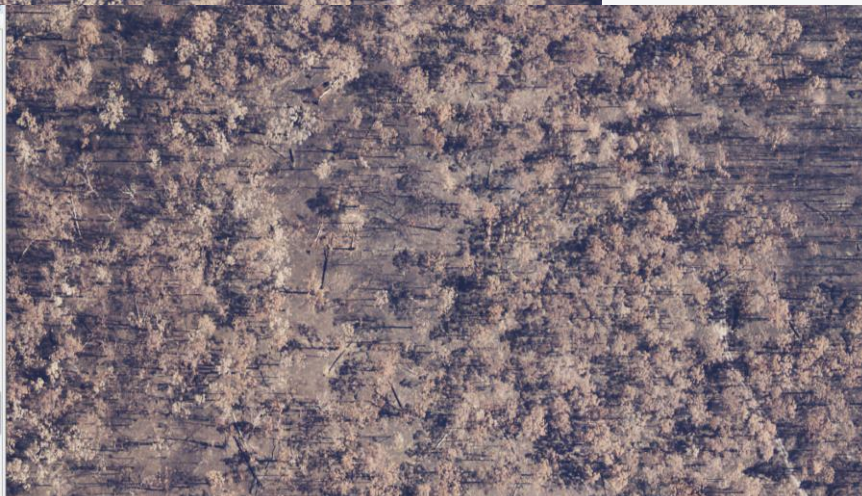

**Figure S3.** Intermittent crown fire class on the aerial photography.
